# Supplementary material for: Storage and Algal Association of Bacteria That Protect Microchloropsis salina from Grazing by Brachionus plicatilis
Source: MDPI journal article supplement (doi:10.3390/microorganisms11030786), 2023-03-18
Supplement: s1 [file s1]

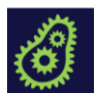

## Supplemental Figures

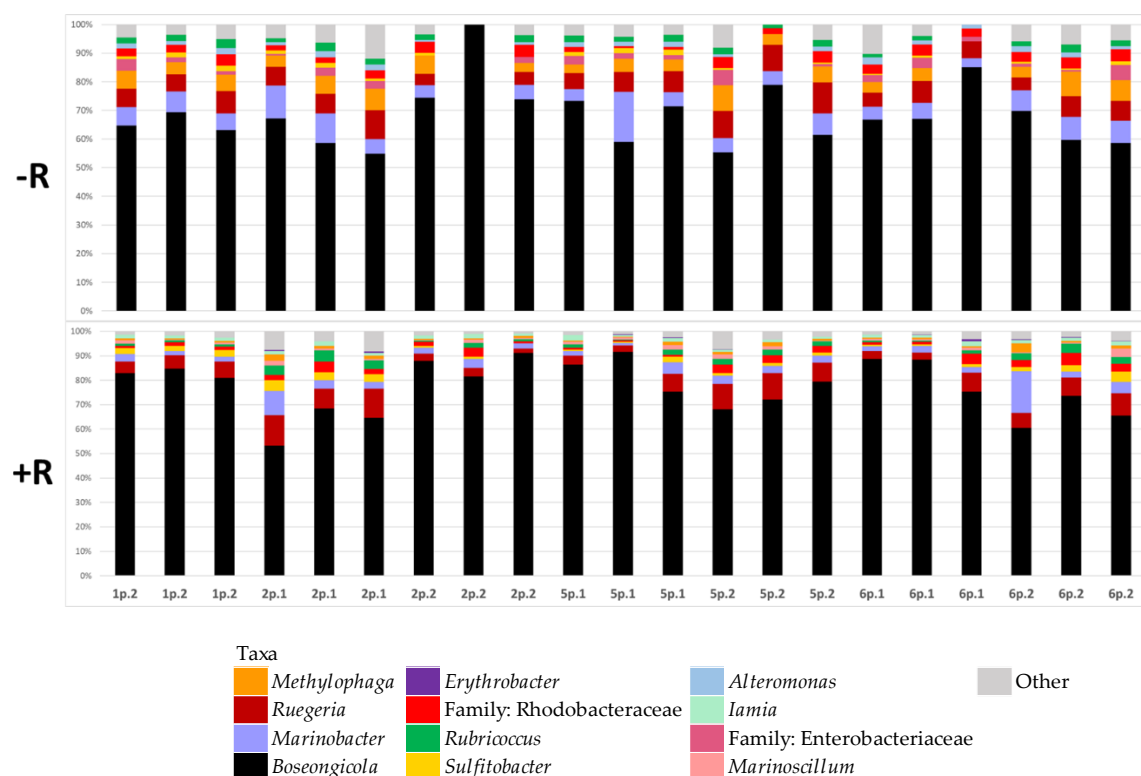

**Figure S1:** Stacked bar graph of the bacterial OTUs consisting of 99% of the total abundance present in every culture in the 40ret fraction. Bacterial OTUs shown represent bacteria associated with *B. plicatilis* in the absence (top, -R) and presence (bottom, +R) of *B. plicatilis*. Taxonomy is shown at the genus level unless otherwise stated. Bacterial OTUs less than 1% of the total abundance is categorized in 'Other' (grey).

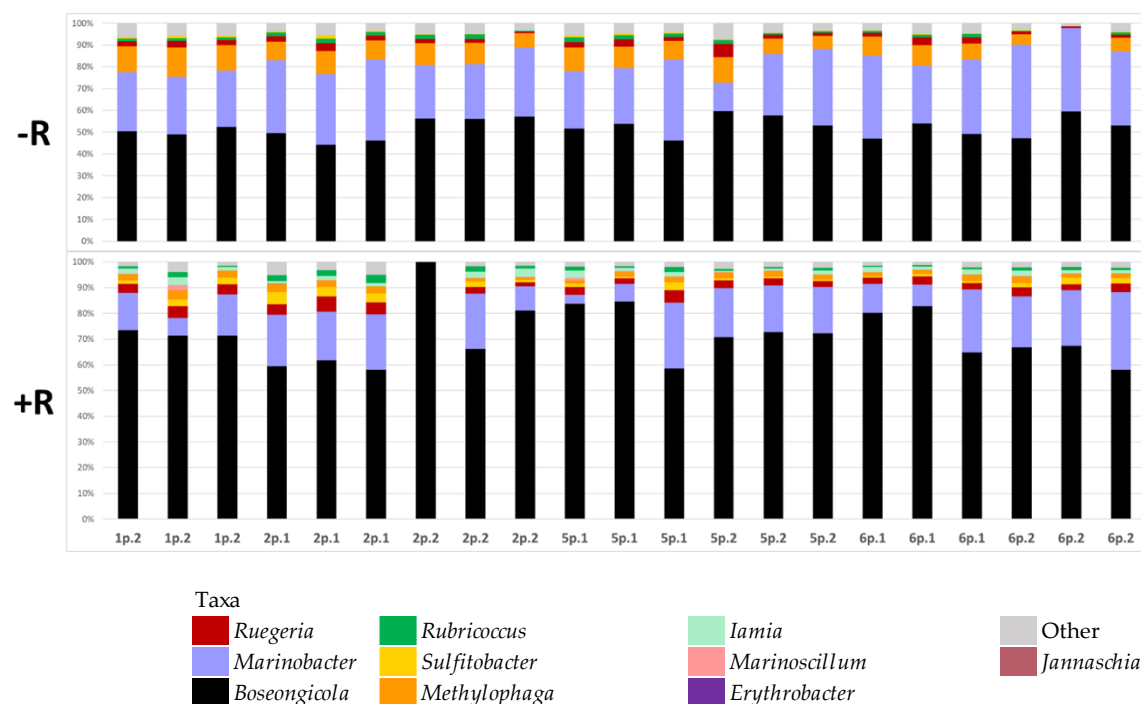

**Figure S2:** Stacked bar graph of the bacterial OTUs consisting of 99% of the total abundance present in every culture in the 0.8ret fraction. Bacterial OTUs shown represent bacteria associated with *B. plicatilis* in the absence (top, -R) and presence (bottom, +R) of *B. plicatilis*.

(bottom, +R) of *B. plicatilis*. Taxonomy is shown at the genus level unless otherwise stated. Bacterial OTUs less than 1% of the total abundance is categorized in ‘Other’ (grey).

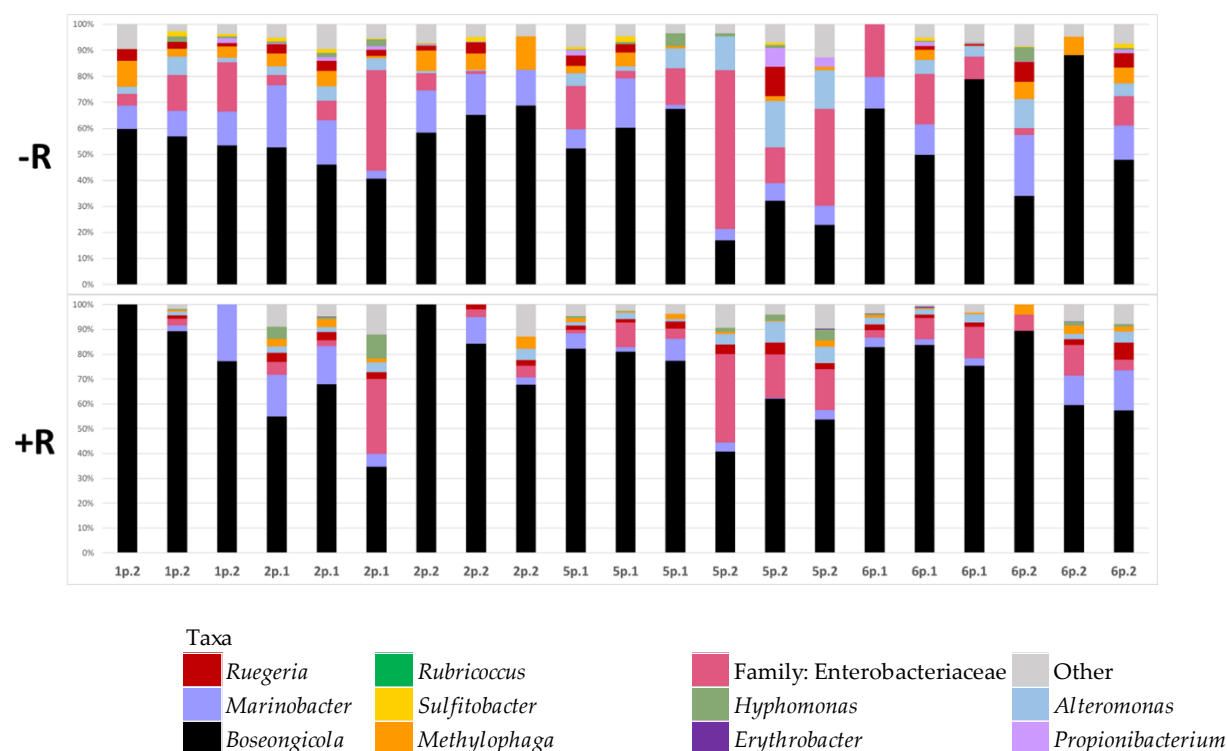

**Figure S3:** Stacked bar graph of the bacterial OTUs consisting of 99% of the total abundance present in every culture in the 0.22ret fraction. Bacterial OTUs shown represent bacteria associated with *B. plicatilis* in the absence (top, -R) and presence (bottom, +R) of *B. plicatilis*. Taxonomy is shown at the genus level unless otherwise stated. Bacterial OTUs less than 1% of the total abundance is categorized in ‘Other’ (grey).
